# Supplementary material
Source: PubMed Central journal article supplement (PMC3418749)
Supplement: IAI.00437-12_zii999099767so1.pdf [file IAI.00437-12_zii999099767so1.pdf]

Supplement 1. Primer sequences for quantitative real-time RT-PCR

| <b>cDNA target</b>     | <b>Sequence (5' → 3')<sup>a</sup></b>                                  | <b>Accession no.<sup>b</sup> or reference</b> | <b>Annealing temp.</b> |
|------------------------|------------------------------------------------------------------------|-----------------------------------------------|------------------------|
| GAPDH                  | <b>F:</b> GTCAGCAATGCATCGTGCA<br><b>R:</b> GGCATGGACAGTGGTCATAAGA      | (5)                                           | 54 °C                  |
| IFN- $\gamma$          | <b>F:</b> CCCGATGAACGACTTGAGAAT<br><b>R:</b> AGACTGGCTCCTTTTCCTTTTG    | (10)                                          | 56 °C                  |
| iNOS                   | <b>F:</b> GAACAGCCAGCTCATCCGATA<br><b>R:</b> CCCAAGCTCAATGCACAACCTT    | (5)                                           | 54 °C                  |
| IL-1 $\beta$           | <b>F:</b> CAGCCAGAAAGTGAGGCTCAA<br><b>R:</b> CGCTCATCACACACGACATGTA    | NM_204524                                     | 57 °C                  |
| IL-4                   | <b>F:</b> TGACATCCAGGGAGAGGTTTCC<br><b>R:</b> GCTGGCTCTCCCAAACAATTGT   | (35)                                          | 54 °C                  |
| IL-6                   | <b>F:</b> TTCGACGAGGAGAAATGCCT<br><b>R:</b> CGACGTTCTGCTTTTCGCTAT      | NM_204628                                     | 56 °C                  |
| IL-8<br>(CXCL-8)       | <b>F:</b> AAGGCACTTATGGCCAAGGCT<br><b>R:</b> ACCGATGTGGAAGGTGGAAGA     | (10)                                          | 55 °C                  |
| IL-10                  | <b>F:</b> AGGAGACGTTTCGAGAAGATGGAT<br><b>R:</b> TCACTTCCTCCTCCTCATCAGC | NM_001004414                                  | 56 °C                  |
| IL-12 $\beta$<br>(p40) | <b>F:</b> TGGTCCACGCTTTGCAGAT<br><b>R:</b> AAGGTTAAGGCGTGGCTTCTTA      | (5)                                           | 54 °C                  |
| IL-15                  | <b>F:</b> CGCAATGTATATTCCCGATCCA<br><b>R:</b> TTTTCTGACTCTCCGGCCTTC    | NM_204571                                     | 56 °C                  |
| IL-17 $\alpha$         | <b>F:</b> GCTGGATGCCTAACCCAAAA<br><b>R:</b> TCGATCCTGTAATCCCATGGA      | NM_204460                                     | 56 °C                  |

|                           |                                                                      |              |       |
|---------------------------|----------------------------------------------------------------------|--------------|-------|
| IL-18                     | <b>F:</b> TCTGGCAGTGGAAATGTA<br><b>R:</b> CCATTTTCCCATGCTCTTTCTC     | (5)          | 54 °C |
| IL-22                     | <b>F:</b> CTACACCTTGGCTGAAATGGC<br><b>R:</b> TTCATCATGTAGCAGCGGTTG   | NM_001199614 | 56 °C |
| LITAF                     | <b>F:</b> GCTGTTCTATGACCGCCCAGTT<br><b>R:</b> AACCAACCAGCTATGCACCCCA | (5)          | 56 °C |
| MIP-1 $\beta$<br>(CCL4L1) | <b>F:</b> TCCTGCTGCTTCACCTACATCT<br><b>R:</b> ATGAACACAACACCAGCATGAG | (5)          | 59 °C |
| TLR-4                     | <b>F:</b> TTCAAGGTGCCACATCCATA<br><b>R:</b> AGCGACGTTAAGCCATGGAAG    | (35)         | 56 °C |
| XCL1                      | <b>F:</b> AGGAAGCGTTGCAAGTCAGTCA<br><b>R:</b> GCAGACTGCACCCATTTCTGTT | (10)         | 56 °C |
| 16S rRNA                  | <b>F:</b> CTTGTACACACCGCCCGTC<br><b>R:</b> GCCCAACCTAGTCAAACCGTC     | (21)         | 58 °C |
| <i>cpaf</i>               | <b>F:</b> CGCACCTGAGCATCGTTA<br><b>R:</b> AAGACAAAACCCCCAGCTCCT      | (21)         | 57 °C |
| <i>ftsW</i>               | <b>F:</b> TTGTTCCCTGCGTCGCTATC<br><b>R:</b> AAAAGCTATTACGGCTGCGGA    | (21)         | 57 °C |
| <i>groEL</i>              | <b>F:</b> CAACAGGTAGCAGAATCCGGA<br><b>R:</b> CTCTTCGCTGATAAGTTGGCAA  | (21)         | 58 °C |
| <i>incA</i>               | <b>F:</b> CATGTGGAGGAAAGTCGCG<br><b>R:</b> CCCTGATCTGCCGTTTCTGT      | (21)         | 58 °C |
| <i>ompA</i>               | <b>F:</b> GCATTATTGTTTGCCGCTAC;<br><b>R:</b> ATCACCTGAAGCACCTTCCCA   | L39020       | 56 °C |

---

<sup>a</sup> Forward primer (F); reverse primer (R)

<sup>b</sup> denotes NCBI acc. no. of source sequence

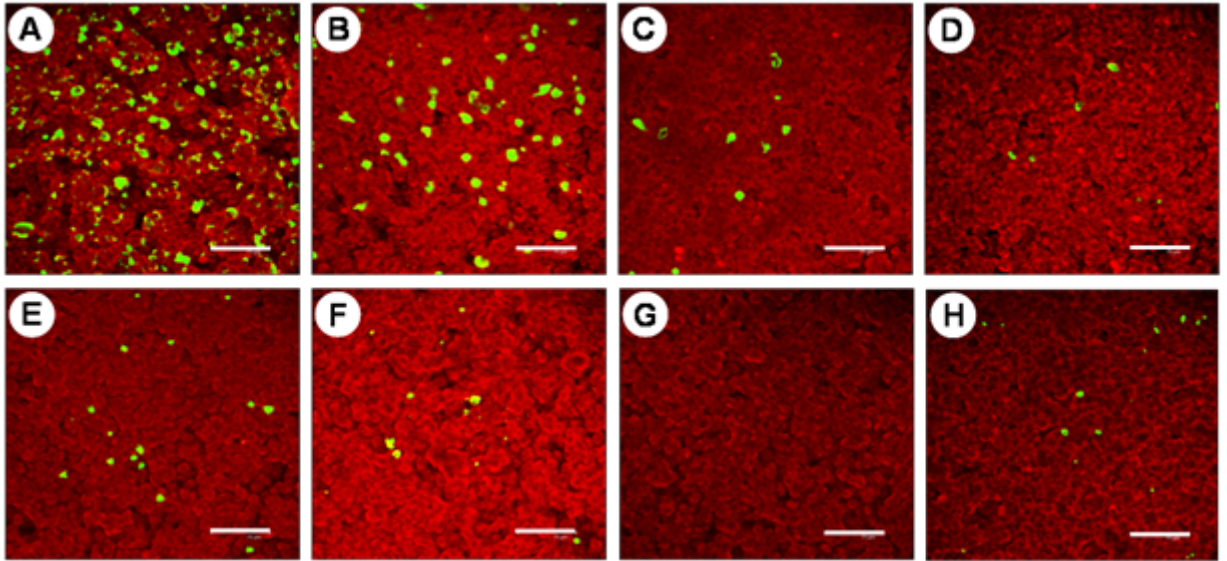

**Supplement 2:**

Representative confocal laser-scanning micrographs showing recovery of *C. psittaci* and *C. abortus* from infected tissues (CAM and liver), at 44 h of culture in BGM cells (chlamydiae in green, BGM cytoplasm in red, bar = 75  $\mu$ m).

**A-D:** recovery of *C. psittaci*, **A:** from CAM at 4 dpi, **B:** from CAM at 8 dpi, **C:** from liver at 4 dpi, **D:** from liver at 8 dpi,

**E-H:** recovery of *C. abortus*,

**E:** from CAM at 4 dpi, **F:** from CAM at 8 dpi, **G:** from liver at 4 dpi, **H:** from liver at 8 dpi

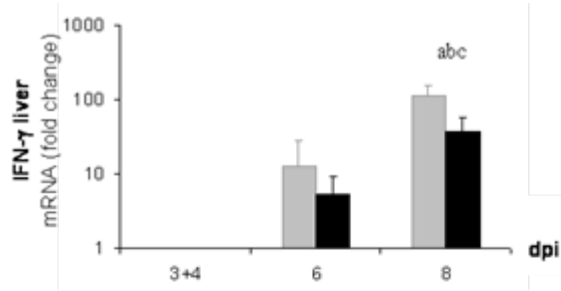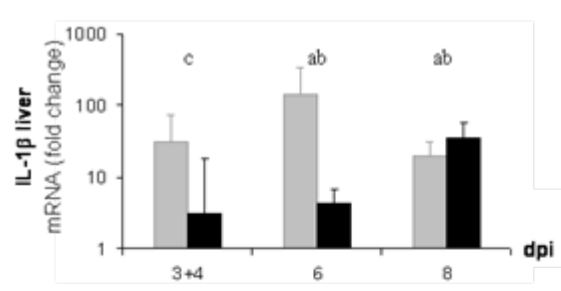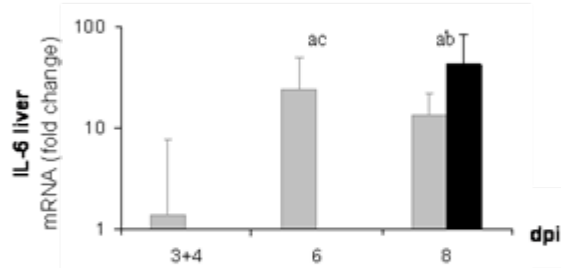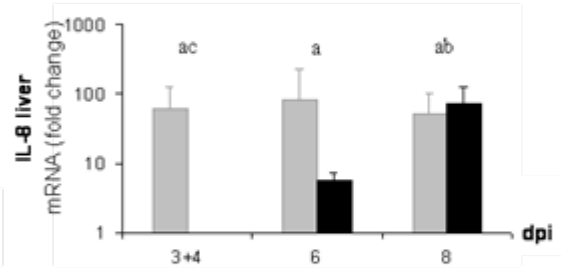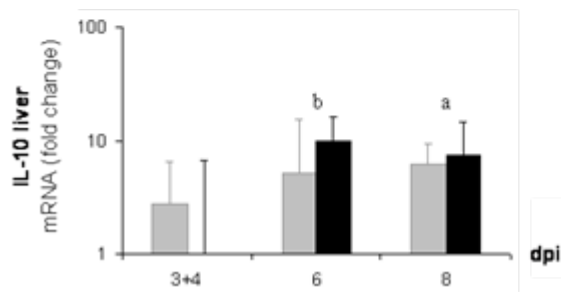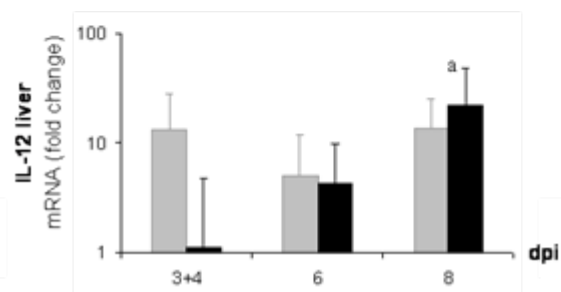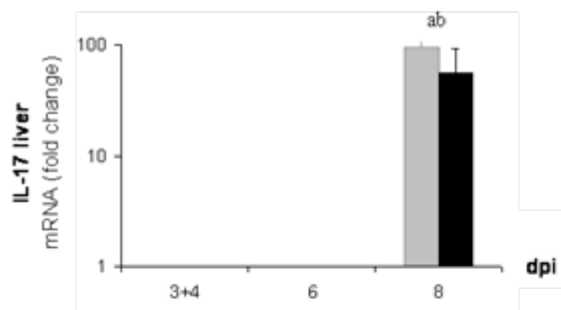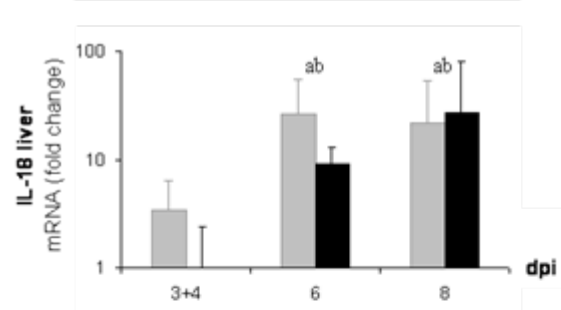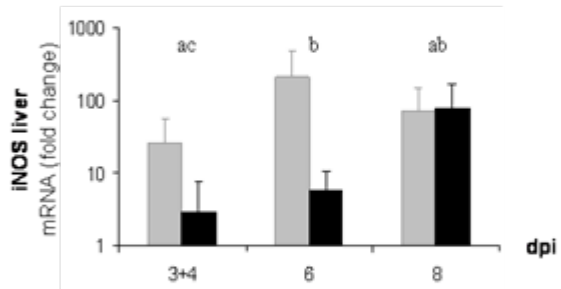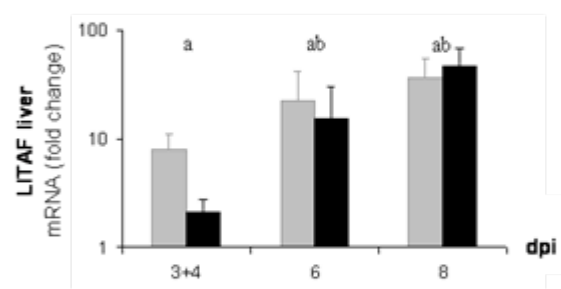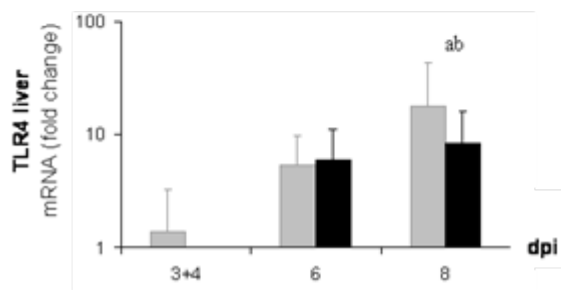

### Supplement 3:

Relative quantification of mRNA expression levels of several immune genes in embryonic liver after infection with *C. psittaci* (■) and *C. abortus* (■) compared to mock infection.

<sup>a, b, c</sup> Means are significantly different ( $P \leq 0.05$ )

**a:** *C. psittaci* vs. mock; **b:** *C. abortus* vs. mock; **c:** *C. psittaci* vs. *C. abortus*

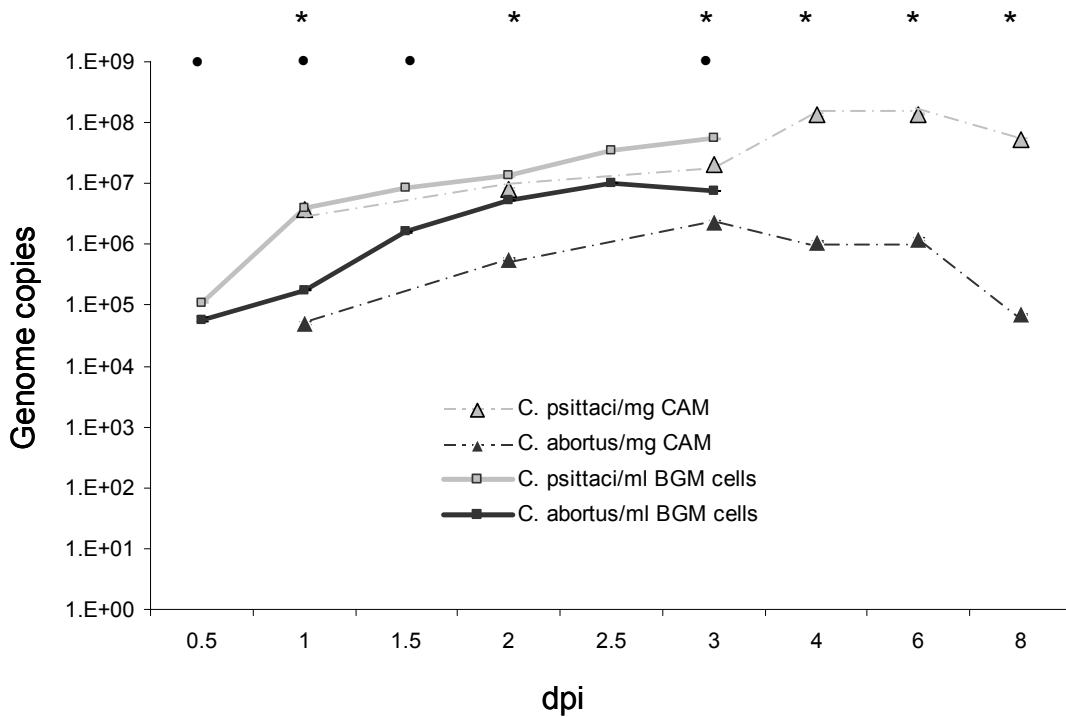

Braukmann et al.

**Supplement 4:**

Quantitative growth curves for *C. psittaci* DC15 and *C. abortus* S26/3 in CAM of embryonated chicken eggs and BGM cell culture. Genome copies in cell culture were calculated per ml cell suspension, and copy numbers in CAM were calculated per mg tissue.

\*; • Medians are significantly different ( $P \leq 0.05$ ) between *C. psittaci*- and *C. abortus*-infected CAM-tissue (\*) or *C. psittaci*- and *C. abortus*-infected BGM cell culture (•)(calculated by Mann-Whitney U-test).

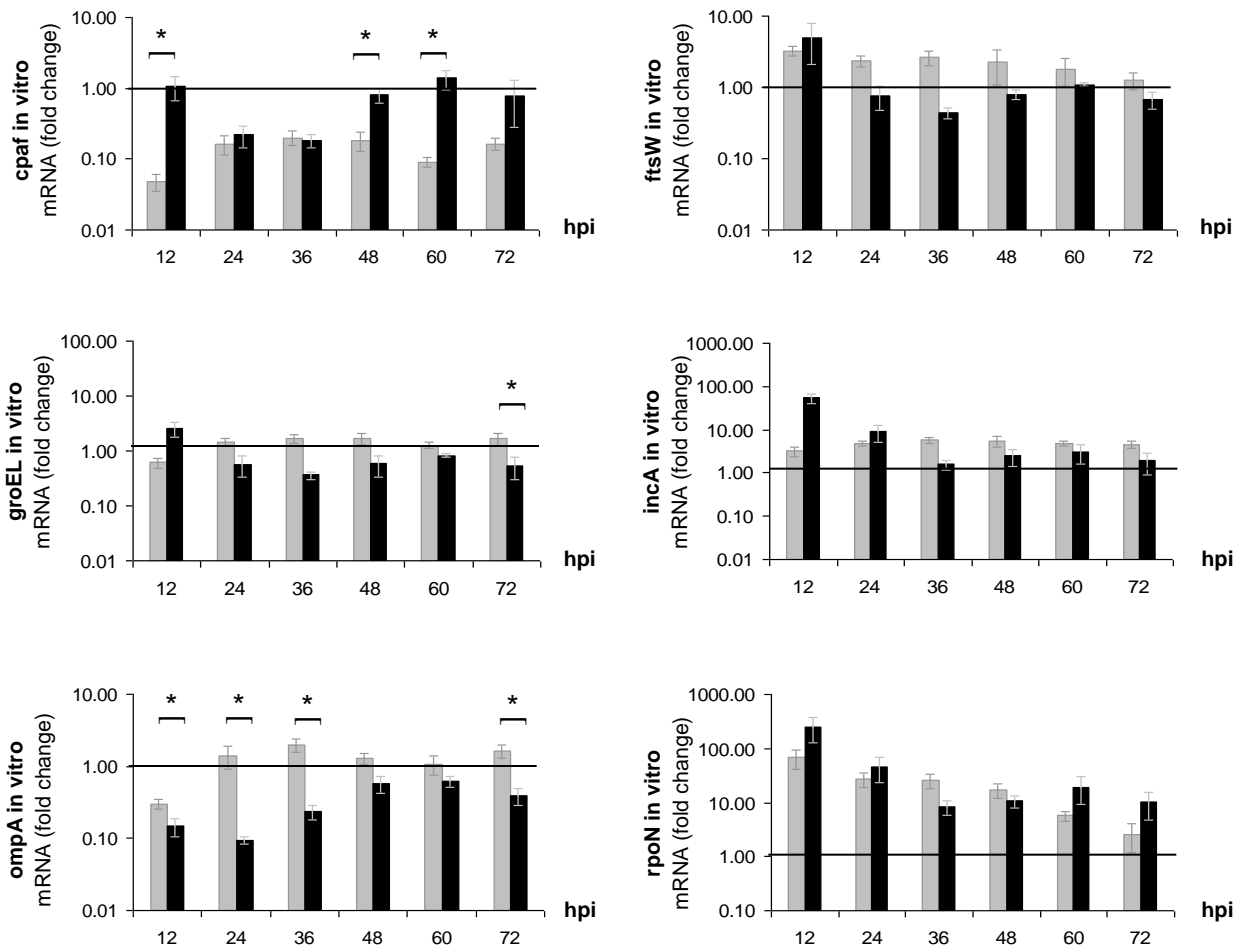

Braukmann et al.

**Supplement 5:**

mRNA expression levels of essential genes of *C. psittaci* (■) and *C. abortus* (■) in BGM cell culture. Data are presented as fold-changes compared to chlamydial inocula prior to administration.

\*; \*\* Means are significantly different (\* $P \leq 0.05$ ; \*\*  $P \leq 0.01$ ) between *C. psittaci*- and *C. abortus*-infected cells (calculated by Mann-Whitney U-test).
